# Supplementary material for: A mixed-methods study measuring the effectiveness of a menstrual health intervention on menstrual health knowledge, perceptions and practices among young women in Zimbabwe
Source: HighWire-hosted journal article supplement (doi:10.1136/bmjopen-2022-067897), 2023-03-01
Supplement: bmjopen-2022-067897supp001_data_supplement.pdf [file bmjopen-2022-067897supp001_data_supplement.pdf]

| <b>MH STUDY ADMINISTRATION</b>                                                                                                                                                                                                                                                                                                                                                                                                                                     |                     |                                    |                                                                                                                                                                                                                                                                                                                                                                                                                                                                                                                     |
|--------------------------------------------------------------------------------------------------------------------------------------------------------------------------------------------------------------------------------------------------------------------------------------------------------------------------------------------------------------------------------------------------------------------------------------------------------------------|---------------------|------------------------------------|---------------------------------------------------------------------------------------------------------------------------------------------------------------------------------------------------------------------------------------------------------------------------------------------------------------------------------------------------------------------------------------------------------------------------------------------------------------------------------------------------------------------|
| <b>This section is to be filled out by the attending staff member</b>                                                                                                                                                                                                                                                                                                                                                                                              |                     |                                    |                                                                                                                                                                                                                                                                                                                                                                                                                                                                                                                     |
| <b>A00</b>                                                                                                                                                                                                                                                                                                                                                                                                                                                         | <i>STAFFNO</i>      | Staff Initials                     | □□□                                                                                                                                                                                                                                                                                                                                                                                                                                                                                                                 |
| <b>A01</b>                                                                                                                                                                                                                                                                                                                                                                                                                                                         | <i>STUDYN<br/>O</i> | Study Participant<br>Cohort Number | □□□□□□                                                                                                                                                                                                                                                                                                                                                                                                                                                                                                              |
| <b>A02</b>                                                                                                                                                                                                                                                                                                                                                                                                                                                         | <i>DOB</i>          | Date of Birth<br>(dd/mm/yyyy)      | □□/□□/□□□□                                                                                                                                                                                                                                                                                                                                                                                                                                                                                                          |
| <b>A03</b>                                                                                                                                                                                                                                                                                                                                                                                                                                                         | <i>AGE</i>          |                                    | □□                                                                                                                                                                                                                                                                                                                                                                                                                                                                                                                  |
| <b>A04</b>                                                                                                                                                                                                                                                                                                                                                                                                                                                         | <i>DATE</i>         | Date of visit<br>(dd/mm/yyyy)      | □□/□□/20□□                                                                                                                                                                                                                                                                                                                                                                                                                                                                                                          |
| <b>A05</b>                                                                                                                                                                                                                                                                                                                                                                                                                                                         | <i>VISIT</i>        | Type of visit                      | Initial <input type="checkbox"/> 6m <input type="checkbox"/> 12m <input type="checkbox"/>                                                                                                                                                                                                                                                                                                                                                                                                                           |
| <p>This questionnaire is to be filled out by participants in the menstrual health study</p> <p>The purpose of this questionnaire is to collect information about you and how you feel and behave during your period.</p> <p>There are 9 parts to this questionnaire. It should not take more than 30 minutes of your time. Please read the questions carefully and fill in the questionnaire as honestly as possible.</p> <p>Thank you for your participation.</p> |                     |                                    |                                                                                                                                                                                                                                                                                                                                                                                                                                                                                                                     |
| <b>PART I: SOCIODEMOGRAPHIC INFORMATION</b>                                                                                                                                                                                                                                                                                                                                                                                                                        |                     |                                    |                                                                                                                                                                                                                                                                                                                                                                                                                                                                                                                     |
| <b>These questions are to help understand more about your life</b>                                                                                                                                                                                                                                                                                                                                                                                                 |                     |                                    |                                                                                                                                                                                                                                                                                                                                                                                                                                                                                                                     |
| <b>A06</b>                                                                                                                                                                                                                                                                                                                                                                                                                                                         | <i>EDU</i>          | Highest Level of Education         | <p>Please tick your highest level of education:</p> <p>No Formal School Education <input type="checkbox"/></p> <p>Incomplete Primary School <input type="checkbox"/></p> <p>Complete Primary School <input type="checkbox"/></p> <p>Incomplete High School Education <input type="checkbox"/></p> <p>Complete High School Education (O'Levels) <input type="checkbox"/></p> <p>Complete High School Education (A'Levels) <input type="checkbox"/></p> <p>Incomplete Tertiary Education <input type="checkbox"/></p> |

|            |              |                                                 |                                                                                                                                                                                                                                                                                                                                                                                                                          |
|------------|--------------|-------------------------------------------------|--------------------------------------------------------------------------------------------------------------------------------------------------------------------------------------------------------------------------------------------------------------------------------------------------------------------------------------------------------------------------------------------------------------------------|
|            |              |                                                 | Complete University <input type="checkbox"/>                                                                                                                                                                                                                                                                                                                                                                             |
| <b>A07</b> | <i>JOB</i>   | Do you have a paying job?                       | Yes <input type="checkbox"/> No <input type="checkbox"/>                                                                                                                                                                                                                                                                                                                                                                 |
| <b>A08</b> | <i>MONEY</i> | If you do not work, where do you get your money | <p>I do not get money from anyone <input type="checkbox"/></p> <p>I get money from a relative in the household (mother/father/brother/sister etc.) <input type="checkbox"/></p> <p>I get money from a relative outside the household <input type="checkbox"/></p> <p>I get money from my partner <input type="checkbox"/></p> <p>Other <input type="checkbox"/></p> <p>If you chose "Other", please list here: _____</p> |
| <b>A09</b> | <i>MSTAT</i> | Marital Status                                  | <p>Single (Never Married) <input type="checkbox"/></p> <p>Married, or living as if you are married <input type="checkbox"/></p> <p>Widowed <input type="checkbox"/></p> <p>Divorced/Separated <input type="checkbox"/></p>                                                                                                                                                                                               |
| <b>A10</b> | <i>RES</i>   | Residence                                       | <p>Urban <input type="checkbox"/></p> <p>Peri-Urban <input type="checkbox"/></p> <p>Rural <input type="checkbox"/></p>                                                                                                                                                                                                                                                                                                   |
| <b>A11</b> | <i>RELGN</i> | Religion                                        | <p>Not Religious <input type="checkbox"/></p> <p>Traditional <input type="checkbox"/></p> <p>Christian (Pentecostal) <input type="checkbox"/></p> <p>Christian (Protestant) <input type="checkbox"/></p> <p>Roman Catholic <input type="checkbox"/></p> <p>Other <input type="checkbox"/></p>                                                                                                                            |

|                                                                                                                        |                  |                                                  |                                                                                                                                                                                                                                                                                                                                                                             |
|------------------------------------------------------------------------------------------------------------------------|------------------|--------------------------------------------------|-----------------------------------------------------------------------------------------------------------------------------------------------------------------------------------------------------------------------------------------------------------------------------------------------------------------------------------------------------------------------------|
|                                                                                                                        |                  |                                                  | If you chose "Other", please list here: _____                                                                                                                                                                                                                                                                                                                               |
| <b>A12</b>                                                                                                             | <i>HH</i>        | Please tick any items your household has:        | <p>Please tick all that apply:</p> <p>Television <input type="checkbox"/></p> <p>Radio <input type="checkbox"/></p> <p>Mobile Phone <input type="checkbox"/></p> <p>Electricity <input type="checkbox"/></p> <p>Water source inside the house <input type="checkbox"/></p> <p>Latrine inside the house <input type="checkbox"/></p>                                         |
| <b>A13</b>                                                                                                             | <i>INC</i>       | How many people live in your household with you: | <p>None (I live alone) <input type="checkbox"/></p> <p>1 – 3 other people <input type="checkbox"/></p> <p>4 – 6 other people <input type="checkbox"/></p> <p>More than 6 people <input type="checkbox"/></p>                                                                                                                                                                |
| <b>PART II: GENERAL QUESTIONS ABOUT YOURSELF</b><br>These questions are about you and why you came to the CHIEDZA site |                  |                                                  |                                                                                                                                                                                                                                                                                                                                                                             |
| <b>A14</b>                                                                                                             | <i>CHIEDZA 1</i> | What brought you to CHIEDZA today?               | <p>Please tick all that apply:</p> <p>STI Treatment <input type="checkbox"/></p> <p>Menstrual Hygiene Management <input type="checkbox"/></p> <p>HIV Testing <input type="checkbox"/></p> <p>HIV Treatment <input type="checkbox"/></p> <p>Condoms <input type="checkbox"/></p> <p>Family Planning <input type="checkbox"/></p> <p>Counselling <input type="checkbox"/></p> |

|                                                                     |              |                                                                                 |                                                                                                |
|---------------------------------------------------------------------|--------------|---------------------------------------------------------------------------------|------------------------------------------------------------------------------------------------|
|                                                                     |              |                                                                                 | Other <input type="checkbox"/><br><br>If you chose "Other", please list here: _____            |
| <b>A15</b>                                                          | CHIEDZA<br>2 | Would you come to CHIEDZA if you could not receive MH products and information? | Yes <input type="checkbox"/> No <input type="checkbox"/>                                       |
| <b>PART III: PERIOD and PUBERTY KNOWLEDGE</b>                       |              |                                                                                 |                                                                                                |
| These questions are about your understanding of puberty and periods |              |                                                                                 |                                                                                                |
| <b>QUESTIONS ABOUT PUBERTY AND MENSTRUATION</b>                     |              |                                                                                 |                                                                                                |
| <b>A16</b>                                                          | KNW1         | Changes in the body during puberty happen because of hormones                   | Yes <input type="checkbox"/> No <input type="checkbox"/> I don't know <input type="checkbox"/> |
| <b>A17</b>                                                          | KNW2         | Puberty continues throughout a girl's life                                      | Yes <input type="checkbox"/> No <input type="checkbox"/> I don't know <input type="checkbox"/> |
| <b>A18</b>                                                          | KNW2         | Menstruation in girls and women is normal                                       | Yes <input type="checkbox"/> No <input type="checkbox"/> I don't know <input type="checkbox"/> |
| <b>A19</b>                                                          | KNW3         | When a girl gets her first menstrual period, her body is able to carry a child  | Yes <input type="checkbox"/> No <input type="checkbox"/> I don't know <input type="checkbox"/> |
| <b>A20</b>                                                          | KNW4         | Menstrual blood is caused by the breakdown of the lining of the womb            | Yes <input type="checkbox"/> No <input type="checkbox"/> I don't know <input type="checkbox"/> |
| <b>A21</b>                                                          | KNW5         | It is normal to have irregular periods as a teenager                            | Yes <input type="checkbox"/> No <input type="checkbox"/> I don't know <input type="checkbox"/> |
| <b>A22</b>                                                          | KNW6         | Menstruation continues throughout a girl's life                                 | Yes <input type="checkbox"/> No <input type="checkbox"/> I don't know <input type="checkbox"/> |
| <b>A23</b>                                                          | KNW7         | A period normally lasts 2 days or less                                          | Yes <input type="checkbox"/> No <input type="checkbox"/> I don't know <input type="checkbox"/> |
| <b>A24</b>                                                          | KNW8         | Period products that are inserted into the vagina                               | Yes <input type="checkbox"/> No <input type="checkbox"/> I don't know <input type="checkbox"/> |

|                                                                  |                 |                                                                                                            |                                                                                                                                                                                                                                                                                                                   |
|------------------------------------------------------------------|-----------------|------------------------------------------------------------------------------------------------------------|-------------------------------------------------------------------------------------------------------------------------------------------------------------------------------------------------------------------------------------------------------------------------------------------------------------------|
|                                                                  |                 | (such as tampons and the menstrual cup) affect your virginity                                              |                                                                                                                                                                                                                                                                                                                   |
| <b>PART IV: QUESTIONS ABOUT YOUR PERIOD HISTORY</b>              |                 |                                                                                                            |                                                                                                                                                                                                                                                                                                                   |
| The following questions are about you and your menstrual periods |                 |                                                                                                            |                                                                                                                                                                                                                                                                                                                   |
| The following questions are about your period history            |                 |                                                                                                            |                                                                                                                                                                                                                                                                                                                   |
| <b>A25</b>                                                       | <i>MENARCHE</i> | How old were you when you first started your periods?                                                      | Age <input type="text"/> <input type="text"/><br>I don't remember <input type="checkbox"/>                                                                                                                                                                                                                        |
| <b>A26</b>                                                       | <i>TAUGHT</i>   | Who first told you or taught you about periods                                                             | No one told me about periods <input type="checkbox"/><br>My mother <input type="checkbox"/><br>My father <input type="checkbox"/><br>My female/male friend <input type="checkbox"/><br>My teacher <input type="checkbox"/><br>Other <input type="checkbox"/><br><br>If you chose "Other", please list here: _____ |
| <b>A27</b>                                                       | <i>INFO1</i>    | Do you feel you had enough information and education to manage your period when you got your first period? | Yes <input type="checkbox"/><br>Somewhat <input type="checkbox"/><br>Not Really <input type="checkbox"/><br>Definitely No <input type="checkbox"/>                                                                                                                                                                |
| <b>A28</b>                                                       | <i>INFO2</i>    | What did you think was happening when you got your first period?                                           | Curse <input type="checkbox"/><br>Disease <input type="checkbox"/><br>Injury <input type="checkbox"/><br>Normal function for young women <input type="checkbox"/><br>I did not know what was happening <input type="checkbox"/>                                                                                   |

|                                                                                                                                                         |                      |                                                                                                      |                                                                                                                         |
|---------------------------------------------------------------------------------------------------------------------------------------------------------|----------------------|------------------------------------------------------------------------------------------------------|-------------------------------------------------------------------------------------------------------------------------|
|                                                                                                                                                         |                      |                                                                                                      | Other <input type="checkbox"/>                                                                                          |
|                                                                                                                                                         |                      |                                                                                                      | If you chose "Other", please list here: _____                                                                           |
| <b>A29</b>                                                                                                                                              | <i>DAYS</i>          | On average, how many days do you usually bleed for during your periods?                              | 1 – 3 days <input type="checkbox"/><br>4 – 7 days <input type="checkbox"/><br>More than 7 days <input type="checkbox"/> |
| <b>A30</b>                                                                                                                                              | <i>RCNTD<br/>AYS</i> | How many days did you bleed during your most recent period?                                          | <input type="checkbox"/> <input type="checkbox"/><br>I Do Not Remember <input type="checkbox"/>                         |
| <b>PART V: QUESTIONS ABOUT PAIN MANAGEMENT</b><br>The following questions are about menstruation-related pain                                           |                      |                                                                                                      |                                                                                                                         |
| <b>A31</b>                                                                                                                                              | <i>PAINK<br/>NW1</i> | Painkillers can be used to relieve menstrual pain                                                    | Yes <input type="checkbox"/> No <input type="checkbox"/> I don't know <input type="checkbox"/>                          |
| <b>A32</b>                                                                                                                                              | <i>PAINK<br/>NW2</i> | Painkillers can cause problems having children (barrenness)                                          | Yes <input type="checkbox"/> No <input type="checkbox"/> I don't know <input type="checkbox"/>                          |
| <b>A33</b>                                                                                                                                              | <i>PAINK<br/>NW3</i> | Exercising, stretching, or putting a warm towel or bottle on your stomach can relieve menstrual pain | Yes <input type="checkbox"/> No <input type="checkbox"/> I don't know <input type="checkbox"/>                          |
| During my last (most recent) menstrual period...                                                                                                        |                      |                                                                                                      |                                                                                                                         |
| <b>A34</b>                                                                                                                                              | <i>PAIN1</i>         | I experienced period-related pain in my lower back and/or abdomen                                    | Yes <input type="checkbox"/> No <input type="checkbox"/>                                                                |
| <b>A35</b>                                                                                                                                              | <i>PAIN2</i>         | I missed work or school due to period-related pain                                                   | Yes <input type="checkbox"/> No <input type="checkbox"/>                                                                |
| <b>PART VI:<br/>QUESTIONS ABOUT PRACTICES AND PERCEPTIONS DURING MENSTRUATION</b><br>The following questions are about how you manage your menstruation |                      |                                                                                                      |                                                                                                                         |
| The following questions are about your last (most recent) period                                                                                        |                      |                                                                                                      |                                                                                                                         |

|            |                |                                                                                                                                 |                                                                                                                                                                                                                                                                                                                                                                                                                         |
|------------|----------------|---------------------------------------------------------------------------------------------------------------------------------|-------------------------------------------------------------------------------------------------------------------------------------------------------------------------------------------------------------------------------------------------------------------------------------------------------------------------------------------------------------------------------------------------------------------------|
| <b>A36</b> | <i>PRDCT</i>   | During your most recent period, what material(s) did you mostly use to collect or absorb your period blood?                     | <p>Please tick all that apply:</p> <p>Cloth/Rags/Fabric <input type="checkbox"/></p> <p>Reusable Pads <input type="checkbox"/></p> <p>Disposable Pads <input type="checkbox"/></p> <p>Menstrual Cup <input type="checkbox"/></p> <p>Period Pants <input type="checkbox"/></p> <p>Other <input type="checkbox"/></p> <p>Not Applicable <input type="checkbox"/></p> <p>If you chose "Other", please list here: _____</p> |
| <b>A37</b> | <i>HPRDCT</i>  | During your most recent period, what material(s) did you mostly use to collect or absorb your period blood when at home?        | <p>Please tick all that apply:</p> <p>Cloth/Rags/Fabric <input type="checkbox"/></p> <p>Reusable Pads <input type="checkbox"/></p> <p>Disposable Pads <input type="checkbox"/></p> <p>Menstrual Cup <input type="checkbox"/></p> <p>Period Pants <input type="checkbox"/></p> <p>Other <input type="checkbox"/></p> <p>Not Applicable <input type="checkbox"/></p> <p>If you chose "Other", please list here: _____</p> |
| <b>A38</b> | <i>SWPRDCT</i> | During your most recent period, what material(s) did you mostly use to collect or absorb your period blood when at school/work? | <p>Please tick all that apply:</p> <p>Cloth/Rags/Fabric <input type="checkbox"/></p> <p>Reusable Pads <input type="checkbox"/></p> <p>Disposable Pads <input type="checkbox"/></p> <p>Menstrual Cup <input type="checkbox"/></p> <p>Period Pants <input type="checkbox"/></p>                                                                                                                                           |

|                                                  |                   |                                                                                              |                                                                                                                                                                                                                                                                                             |
|--------------------------------------------------|-------------------|----------------------------------------------------------------------------------------------|---------------------------------------------------------------------------------------------------------------------------------------------------------------------------------------------------------------------------------------------------------------------------------------------|
|                                                  |                   |                                                                                              | <p style="text-align: right;">Other <input type="checkbox"/></p> <p style="text-align: right;">Not Applicable <input type="checkbox"/></p> <p style="text-align: center;">If you chose "Other", please list here: _____</p>                                                                 |
| During my last (most recent) menstrual period... |                   |                                                                                              |                                                                                                                                                                                                                                                                                             |
| <b>A39</b>                                       | <i>PRDCT</i><br>1 | My menstrual products were comfortable                                                       | <p style="text-align: right;">Strongly Disagree <input type="checkbox"/></p> <p style="text-align: right;">Disagree <input type="checkbox"/></p> <p style="text-align: right;">Agree <input type="checkbox"/></p> <p style="text-align: right;">Strongly Agree <input type="checkbox"/></p> |
| <b>A40</b>                                       | <i>PRDCT</i><br>2 | I had enough of my menstrual products to change them as often as I wanted to                 | <p style="text-align: right;">Strongly Disagree <input type="checkbox"/></p> <p style="text-align: right;">Disagree <input type="checkbox"/></p> <p style="text-align: right;">Agree <input type="checkbox"/></p> <p style="text-align: right;">Strongly Agree <input type="checkbox"/></p> |
| <b>A41</b>                                       | <i>PRDCT</i><br>3 | Before I used them, I was satisfied with the cleanliness of my menstrual products            | <p style="text-align: right;">Strongly Disagree <input type="checkbox"/></p> <p style="text-align: right;">Disagree <input type="checkbox"/></p> <p style="text-align: right;">Agree <input type="checkbox"/></p> <p style="text-align: right;">Strongly Agree <input type="checkbox"/></p> |
| <b>A42</b>                                       | <i>PRDCT</i><br>4 | I could get more of my menstrual materials when I needed to                                  | <p style="text-align: right;">Strongly Disagree <input type="checkbox"/></p> <p style="text-align: right;">Disagree <input type="checkbox"/></p> <p style="text-align: right;">Agree <input type="checkbox"/></p> <p style="text-align: right;">Strongly Agree <input type="checkbox"/></p> |
| <b>A43</b>                                       | <i>PRDCT</i><br>5 | I was worried that my menstrual products would allow blood to pass through my outer garments | <p style="text-align: right;">Strongly Disagree <input type="checkbox"/></p> <p style="text-align: right;">Disagree <input type="checkbox"/></p> <p style="text-align: right;">Agree <input type="checkbox"/></p> <p style="text-align: right;">Strongly Agree <input type="checkbox"/></p> |
| <b>A44</b>                                       | <i>PRDCT</i><br>6 | I was worried that my menstrual products would                                               | <p style="text-align: right;">Strongly Disagree <input type="checkbox"/></p> <p style="text-align: right;">Disagree <input type="checkbox"/></p>                                                                                                                                            |



|                                                                      |                    |                                                                                  |                                                                                                                                                              |
|----------------------------------------------------------------------|--------------------|----------------------------------------------------------------------------------|--------------------------------------------------------------------------------------------------------------------------------------------------------------|
|                                                                      |                    | move from place while I was wearing them                                         | Agree <input type="checkbox"/><br>Strongly Agree <input type="checkbox"/>                                                                                    |
| <b>A45</b>                                                           | <i>PRDCT</i><br>7  | I worried about how I would get more of my menstrual material if I ran out       | Strongly Disagree <input type="checkbox"/><br>Disagree <input type="checkbox"/><br>Agree <input type="checkbox"/><br>Strongly Agree <input type="checkbox"/> |
| <b>A46</b>                                                           | <i>PRDCT</i><br>8  | I felt comfortable carrying spare menstrual products with me outside my home     | Strongly Disagree <input type="checkbox"/><br>Disagree <input type="checkbox"/><br>Agree <input type="checkbox"/><br>Strongly Agree <input type="checkbox"/> |
| <b>A47</b>                                                           | <i>PRDCT</i><br>9  | I felt comfortable carrying menstrual products to the place where I changed them | Strongly Disagree <input type="checkbox"/><br>Disagree <input type="checkbox"/><br>Agree <input type="checkbox"/><br>Strongly Agree <input type="checkbox"/> |
| <b>A48</b>                                                           | <i>PRDCT</i><br>10 | I felt comfortable storing my menstrual products until my next period            | Strongly Disagree <input type="checkbox"/><br>Disagree <input type="checkbox"/><br>Agree <input type="checkbox"/><br>Strongly Agree <input type="checkbox"/> |
| <b>A49</b>                                                           | <i>PRDCT</i><br>11 | I was able to wash my hands <u>when</u> I wanted to                              | Strongly Disagree <input type="checkbox"/><br>Disagree <input type="checkbox"/><br>Agree <input type="checkbox"/><br>Strongly Agree <input type="checkbox"/> |
| <b>If participant ticks "Disposable Pads" or "Cloth/Rags/Fabric"</b> |                    |                                                                                  |                                                                                                                                                              |
| During my last (most recent) period...                               |                    |                                                                                  |                                                                                                                                                              |
| <b>B1</b>                                                            | <i>DIS1</i>        | I was able to immediately dispose of my used menstrual material                  | Strongly Disagree <input type="checkbox"/><br>Disagree <input type="checkbox"/><br>Agree <input type="checkbox"/>                                            |

|                                                                                         |              |                                                                                           |                                                                                                                                                              |
|-----------------------------------------------------------------------------------------|--------------|-------------------------------------------------------------------------------------------|--------------------------------------------------------------------------------------------------------------------------------------------------------------|
|                                                                                         |              |                                                                                           | Strongly Agree <input type="checkbox"/>                                                                                                                      |
| <b>B2</b>                                                                               | <i>DIS2</i>  | I was able to dispose of my used menstrual material in the way I wanted to                | Strongly Disagree <input type="checkbox"/><br>Disagree <input type="checkbox"/><br>Agree <input type="checkbox"/><br>Strongly Agree <input type="checkbox"/> |
| <b>B3</b>                                                                               | <i>DIS3</i>  | I worried about where to dispose of my used menstrual materials                           | Strongly Disagree <input type="checkbox"/><br>Disagree <input type="checkbox"/><br>Agree <input type="checkbox"/><br>Strongly Agree <input type="checkbox"/> |
| <b>B4</b>                                                                               | <i>DIS4</i>  | I was concerned that others would see my menstrual materials in the place I disposed them | Strongly Disagree <input type="checkbox"/><br>Disagree <input type="checkbox"/><br>Agree <input type="checkbox"/><br>Strongly Agree <input type="checkbox"/> |
| <b>If participant ticks “Cloth/Rags/Fabric”, “Period Pants” and/or “Reusable Pads”:</b> |              |                                                                                           |                                                                                                                                                              |
| During my last (most recent) period...                                                  |              |                                                                                           |                                                                                                                                                              |
| <b>C1</b>                                                                               | <i>REUS1</i> | I had enough water to soak or wash my menstrual products                                  | Strongly Disagree <input type="checkbox"/><br>Disagree <input type="checkbox"/><br>Agree <input type="checkbox"/><br>Strongly Agree <input type="checkbox"/> |
| <b>C2</b>                                                                               | <i>REUS2</i> | I had access to a basin or dish to soak or wash my menstrual products whenever I needed   | Strongly Disagree <input type="checkbox"/><br>Disagree <input type="checkbox"/><br>Agree <input type="checkbox"/><br>Strongly Agree <input type="checkbox"/> |
| <b>C3</b>                                                                               | <i>REUS3</i> | I was able to wash my menstrual products <u>when</u> I wanted to                          | Strongly Disagree <input type="checkbox"/><br>Disagree <input type="checkbox"/><br>Agree <input type="checkbox"/><br>Strongly Agree <input type="checkbox"/> |

|            |               |                                                                                                      |                                                                                                                                                                                                                                                                               |
|------------|---------------|------------------------------------------------------------------------------------------------------|-------------------------------------------------------------------------------------------------------------------------------------------------------------------------------------------------------------------------------------------------------------------------------|
| <b>C4</b>  | <i>REUS4</i>  | I had enough soap to wash my menstrual products                                                      | Strongly Disagree <input type="checkbox"/><br>Disagree <input type="checkbox"/><br>Agree <input type="checkbox"/><br>Strongly Agree <input type="checkbox"/>                                                                                                                  |
| <b>C5</b>  | <i>REUS5</i>  | I was able to dry my products <u>when</u> I wanted to                                                | Strongly Disagree <input type="checkbox"/><br>Disagree <input type="checkbox"/><br>Agree <input type="checkbox"/><br>Strongly Agree <input type="checkbox"/>                                                                                                                  |
| <b>C6</b>  | <i>REUS6</i>  | I was worried that someone would see me while I was washing my menstrual products                    | Strongly Disagree <input type="checkbox"/><br>Disagree <input type="checkbox"/><br>Agree <input type="checkbox"/><br>Strongly Agree <input type="checkbox"/>                                                                                                                  |
| <b>C7</b>  | <i>REUS7</i>  | I was worried that my menstrual products would not be dry when I needed them                         | Strongly Disagree <input type="checkbox"/><br>Disagree <input type="checkbox"/><br>Agree <input type="checkbox"/><br>Strongly Agree <input type="checkbox"/>                                                                                                                  |
| <b>C8</b>  | <i>REUS8</i>  | I was worried that others would see my menstrual products while they were drying                     | Strongly Disagree <input type="checkbox"/><br>Disagree <input type="checkbox"/><br>Agree <input type="checkbox"/><br>Strongly Agree <input type="checkbox"/>                                                                                                                  |
| <b>C9</b>  | <i>REUS9</i>  | How often did you change your menstrual products during the heaviest day of your most recent period? | Once a day (within a 24hr period) <input type="checkbox"/><br>Twice a day (within a 24hr period) <input type="checkbox"/><br>Three times a day (within a 24hr period) <input type="checkbox"/><br>More than three times a day (within a 24hr period) <input type="checkbox"/> |
| <b>C10</b> | <i>REUS10</i> | At home, where did you most often change your menstrual products during your most recent period?     | In a toilet inside the building <input type="checkbox"/><br>In a toilet outside the building <input type="checkbox"/><br>In a private room <input type="checkbox"/><br>Outside (in the field/by the river) <input type="checkbox"/>                                           |

|            |               |                                                                                                         |                                                                                                                                                                                                                                                                                                                                                                                                                                                                                                                                                                                                                                                             |
|------------|---------------|---------------------------------------------------------------------------------------------------------|-------------------------------------------------------------------------------------------------------------------------------------------------------------------------------------------------------------------------------------------------------------------------------------------------------------------------------------------------------------------------------------------------------------------------------------------------------------------------------------------------------------------------------------------------------------------------------------------------------------------------------------------------------------|
|            |               |                                                                                                         | <p style="text-align: right;">Other <input type="checkbox"/></p> <p>If you chose "Other", please explain: _____</p>                                                                                                                                                                                                                                                                                                                                                                                                                                                                                                                                         |
| <b>C11</b> | <i>REUS11</i> | At school/work, where did you most often change your menstrual products during your most recent period? | <p style="text-align: right;">In a toilet inside the building <input type="checkbox"/></p> <p style="text-align: right;">In a toilet inside the building <input type="checkbox"/></p> <p style="text-align: right;">In a toilet outside the building <input type="checkbox"/></p> <p style="text-align: right;">In a private room <input type="checkbox"/></p> <p style="text-align: right;">Outside (in the field/by the river) <input type="checkbox"/></p> <p style="text-align: right;">Other <input type="checkbox"/></p> <p style="text-align: right;">Not applicable <input type="checkbox"/></p> <p>If you chose "Other", please explain: _____</p> |
| <b>C12</b> | <i>REUS12</i> | Where did you wash your menstrual products during your last period?                                     | <p style="text-align: right;">In the bathroom <input type="checkbox"/></p> <p style="text-align: right;">At a private well or tap in the house <input type="checkbox"/></p> <p style="text-align: right;">At a public well or tap outside the house <input type="checkbox"/></p> <p style="text-align: right;">In a pond or river <input type="checkbox"/></p> <p style="text-align: right;">Did not wash your menstrual products <input type="checkbox"/></p> <p style="text-align: right;">Other <input type="checkbox"/></p> <p>If you chose "Other", please explain: _____</p>                                                                          |
| <b>C13</b> | <i>REUS13</i> | What did you use to wash your products with during your most recent period?                             | <p style="text-align: right;">With water only <input type="checkbox"/></p> <p style="text-align: right;">With soap and water <input type="checkbox"/></p> <p style="text-align: right;">Did not wash my menstrual products <input type="checkbox"/></p> <p style="text-align: right;">Other <input type="checkbox"/></p> <p>If you chose "Other", please explain: _____</p>                                                                                                                                                                                                                                                                                 |
| <b>C14</b> | <i>REUS14</i> | Where did you dry your menstrual products during your most recent period?                               | <p style="text-align: right;">Outside in the sun <input type="checkbox"/></p> <p style="text-align: right;">Outside in the sun, under a cloth <input type="checkbox"/></p> <p style="text-align: right;">Inside in the house in an open space <input type="checkbox"/></p>                                                                                                                                                                                                                                                                                                                                                                                  |

|                                              |               |                                                                                                         |                                                                                                                                                                                                                                                                                                                                       |
|----------------------------------------------|---------------|---------------------------------------------------------------------------------------------------------|---------------------------------------------------------------------------------------------------------------------------------------------------------------------------------------------------------------------------------------------------------------------------------------------------------------------------------------|
|                                              |               |                                                                                                         | <p>Inside the house in a closed space <input type="checkbox"/></p> <p>Did not dry my reusable pad, period pants, or cloth/rags/fabric <input type="checkbox"/></p> <p>Other <input type="checkbox"/></p> <p>If you chose "Other", please explain: _____</p>                                                                           |
| <b>C15</b>                                   | <i>REUS15</i> | Did you ever wear your menstrual product when it was damp (not yet dry) during your most recent period? | <p>Yes <input type="checkbox"/> (No <input type="checkbox"/></p> <p>Do Not Remember <input type="checkbox"/></p>                                                                                                                                                                                                                      |
| <b>C16</b>                                   | <i>REUS16</i> | Where did you store your menstrual products after your most recent period?                              | <p>In a cupboard <input type="checkbox"/></p> <p>In the toilet <input type="checkbox"/></p> <p>In an open space <input type="checkbox"/></p> <p>In a hidden place <input type="checkbox"/></p> <p>Did not store <input type="checkbox"/></p> <p>Other <input type="checkbox"/></p> <p>If you chose "Other", please explain: _____</p> |
| <b>If participant ticks "Menstrual Cup":</b> |               |                                                                                                         |                                                                                                                                                                                                                                                                                                                                       |
| During my last (most recent) period...       |               |                                                                                                         |                                                                                                                                                                                                                                                                                                                                       |
| <b>D1</b>                                    | <i>MC1</i>    | I was able to sterilize my menstrual cup <u>when</u> I wanted after my period                           | <p>Strongly Disagree <input type="checkbox"/></p> <p>Disagree <input type="checkbox"/></p> <p>Agree <input type="checkbox"/></p> <p>Strongly Agree <input type="checkbox"/></p>                                                                                                                                                       |
| <b>D2</b>                                    | <i>MC2</i>    | I was able to rinse my menstrual cup <u>when</u> I wanted                                               | <p>Strongly Disagree <input type="checkbox"/></p> <p>Disagree <input type="checkbox"/></p> <p>Agree <input type="checkbox"/></p> <p>Strongly Agree <input type="checkbox"/></p>                                                                                                                                                       |

|           |            |                                                                                                              |                                                                                                                                                                                                                                                                                                                                                   |
|-----------|------------|--------------------------------------------------------------------------------------------------------------|---------------------------------------------------------------------------------------------------------------------------------------------------------------------------------------------------------------------------------------------------------------------------------------------------------------------------------------------------|
| <b>D3</b> | <i>MC3</i> | I had enough water to rinse my menstrual cup                                                                 | <p>Strongly Disagree <input type="checkbox"/></p> <p>Disagree <input type="checkbox"/></p> <p>Agree <input type="checkbox"/></p> <p>Strongly Agree <input type="checkbox"/></p>                                                                                                                                                                   |
| <b>D4</b> | <i>MC4</i> | I was worried that someone would see me while I was rinsing my menstrual cup                                 | <p>Strongly Disagree <input type="checkbox"/></p> <p>Disagree <input type="checkbox"/></p> <p>Agree <input type="checkbox"/></p> <p>Strongly Agree <input type="checkbox"/></p>                                                                                                                                                                   |
| <b>D5</b> | <i>MC5</i> | I was worried that someone would see me while I was sterilizing my menstrual cup                             | <p>Strongly Disagree <input type="checkbox"/></p> <p>Disagree <input type="checkbox"/></p> <p>Agree <input type="checkbox"/></p> <p>Strongly Agree <input type="checkbox"/></p>                                                                                                                                                                   |
| <b>D6</b> | <i>MC6</i> | How long did it take you to get comfortable and relaxed using your menstrual cup?                            | <p>1 Period <input type="checkbox"/></p> <p>2 Periods <input type="checkbox"/></p> <p>3 Periods <input type="checkbox"/></p> <p>4 or More Periods <input type="checkbox"/></p> <p>Still Not Comfortable or Relaxed <input type="checkbox"/></p>                                                                                                   |
| <b>D7</b> | <i>MC7</i> | What is difficult about using your menstrual cup?                                                            | <p>Tick All that Apply:</p> <p>Could not get the cup in <input type="checkbox"/></p> <p>Too much pain and discomfort <input type="checkbox"/></p> <p>Difficult to clean <input type="checkbox"/></p> <p>Difficult to remove <input type="checkbox"/></p> <p>Other <input type="checkbox"/></p> <p>If you chose "Other", please explain: _____</p> |
| <b>D8</b> | <i>MC8</i> | How often did you empty and re-insert your menstrual cup during the heaviest day of your most recent period? | <p>Once a day (within a 24hr period) <input type="checkbox"/></p> <p>Twice a day (within a 24hr period) <input type="checkbox"/></p> <p>Three times a day (within a 24hr period) <input type="checkbox"/></p> <p>More than three times a day (within a 24hr period) <input type="checkbox"/></p>                                                  |

|            |             |                                                                                                                                    |                                                                                                                                                                                                                                                                                                                                                                                                                                                                       |
|------------|-------------|------------------------------------------------------------------------------------------------------------------------------------|-----------------------------------------------------------------------------------------------------------------------------------------------------------------------------------------------------------------------------------------------------------------------------------------------------------------------------------------------------------------------------------------------------------------------------------------------------------------------|
| <b>D9</b>  | <i>MC9</i>  | At home, where did you most often empty and re-insert your menstrual cup when you needed to during your most recent period?        | <p>In a toilet inside the building <input type="checkbox"/></p> <p>In a toilet outside the building <input type="checkbox"/></p> <p>Outside (in the field/by the river) <input type="checkbox"/></p> <p>Other <input type="checkbox"/></p> <p>If you chose "Other", please explain: _____</p>                                                                                                                                                                         |
| <b>D10</b> | <i>MC10</i> | At school/work, where did you most often empty and re-insert your menstrual cup when you needed to during your most recent period? | <p>In a toilet inside the building <input type="checkbox"/></p> <p>In a toilet outside the building <input type="checkbox"/></p> <p>Outside (in the field/by the river) <input type="checkbox"/></p> <p>Not Applicable <input type="checkbox"/></p> <p>Other <input type="checkbox"/></p> <p>If you chose "Other", please explain: _____</p>                                                                                                                          |
| <b>D11</b> | <i>MC11</i> | Where did you rinse your menstrual cup during your last period?                                                                    | <p>In a private bathroom <input type="checkbox"/></p> <p>In a public bathroom <input type="checkbox"/></p> <p>At a private well or tap in the house <input type="checkbox"/></p> <p>At a public well or tap outside the house <input type="checkbox"/></p> <p>In a pond or river <input type="checkbox"/></p> <p>Did not rinse my menstrual cup <input type="checkbox"/></p> <p>Other <input type="checkbox"/></p> <p>If you chose "Other", please explain: _____</p> |
| <b>D12</b> | <i>MC12</i> | What did you rinse your menstrual cup with during your most recent period?                                                         | <p>With water only <input type="checkbox"/></p> <p>With soap and water <input type="checkbox"/></p> <p>Did not rinse my menstrual cup <input type="checkbox"/></p> <p>Other <input type="checkbox"/></p> <p>If you chose "Other", please explain: _____</p>                                                                                                                                                                                                           |

|                                                                                                                       |              |                                                                                                             |                                                                                                                                                                                                                                                                              |
|-----------------------------------------------------------------------------------------------------------------------|--------------|-------------------------------------------------------------------------------------------------------------|------------------------------------------------------------------------------------------------------------------------------------------------------------------------------------------------------------------------------------------------------------------------------|
| <b>D13</b>                                                                                                            | <i>MC13</i>  | During your most recent period, how did you sterilise your menstrual cup?                                   | <p>Boiled cup for 3 min <input type="checkbox"/></p> <p>Washed with boiling water <input type="checkbox"/></p> <p>Soaked in vinegar and water solution <input type="checkbox"/></p> <p>Other <input type="checkbox"/></p> <p>If you chose "Other", please explain: _____</p> |
| <b>D14</b>                                                                                                            | <i>MC14</i>  | Did you store your menstrual cup in an aerated bag between periods?                                         | Yes <input type="checkbox"/> No <input type="checkbox"/>                                                                                                                                                                                                                     |
| <b>D15</b>                                                                                                            | <i>MC15</i>  | During your most recent period, did you ever use a reusable or disposable pad along with the menstrual cup? | Yes <input type="checkbox"/> No <input type="checkbox"/>                                                                                                                                                                                                                     |
| <b>PART V: QUESTIONS ABOUT YOUR WASHING PRACTICES</b>                                                                 |              |                                                                                                             |                                                                                                                                                                                                                                                                              |
| <b>The following questions are about how you wash your body and your vagina during your last (most recent) period</b> |              |                                                                                                             |                                                                                                                                                                                                                                                                              |
| <b>A50</b>                                                                                                            | <i>WASH1</i> | What type of washing did you do when you were on your most recent period?                                   | <p>External genital wash only <input type="checkbox"/></p> <p>Full body wash <input type="checkbox"/></p> <p>I did not wash myself <input type="checkbox"/></p> <p>Other <input type="checkbox"/></p> <p>If you chose "Other", please explain: _____</p>                     |
| <b>A51</b>                                                                                                            | <i>WASH2</i> | On average, how many times did you wash your body during your most recent period?                           | <p>Less than once a day <input type="checkbox"/></p> <p>Once a day <input type="checkbox"/></p> <p>Twice a day <input type="checkbox"/></p> <p>Three times a day or more <input type="checkbox"/></p>                                                                        |
| <b>A52</b>                                                                                                            | <i>WASH3</i> | What did you use to wash yourself during your most recent period?                                           | <p>Water only <input type="checkbox"/></p> <p>Soap and water <input type="checkbox"/></p> <p>Not Applicable <input type="checkbox"/></p> <p>Other <input type="checkbox"/></p> <p>If you chose "Other", please explain: _____</p>                                            |
| <b>PART VII: QUESTIONS ABOUT YOUR ATTITUDES ABOUT MENSTRUATION</b>                                                    |              |                                                                                                             |                                                                                                                                                                                                                                                                              |
| <b>These questions are about how you feel about menstruation</b>                                                      |              |                                                                                                             |                                                                                                                                                                                                                                                                              |



|            |                       |                                                                |                                                                                                                                                                                                  |
|------------|-----------------------|----------------------------------------------------------------|--------------------------------------------------------------------------------------------------------------------------------------------------------------------------------------------------|
| <b>A53</b> | <i>ATTITU<br/>DE1</i> | I feel dirty or impure during my menstrual period              | Strongly Disagree <input type="checkbox"/><br>Disagree <input type="checkbox"/><br>Neutral <input type="checkbox"/><br>Agree <input type="checkbox"/><br>Strongly Agree <input type="checkbox"/> |
| <b>A54</b> | <i>ATTITU<br/>DE2</i> | I feel like I can talk to friends about menstruation           | Strongly Disagree <input type="checkbox"/><br>Disagree <input type="checkbox"/><br>Neutral <input type="checkbox"/><br>Agree <input type="checkbox"/><br>Strongly Agree <input type="checkbox"/> |
| <b>A55</b> | <i>ATTITU<br/>DE3</i> | I feel like I can talk to my family members about menstruation | Strongly Disagree <input type="checkbox"/><br>Disagree <input type="checkbox"/><br>Neutral <input type="checkbox"/><br>Agree <input type="checkbox"/><br>Strongly Agree <input type="checkbox"/> |
| <b>A56</b> | <i>ATTITU<br/>DE4</i> | I feel proud that I have my periods                            | Strongly Disagree <input type="checkbox"/><br>Disagree <input type="checkbox"/><br>Neutral <input type="checkbox"/><br>Agree <input type="checkbox"/><br>Strongly Agree <input type="checkbox"/> |
| <b>A57</b> |                       | It is important that I keep my period a secret from everyone   | Strongly Disagree <input type="checkbox"/><br>Disagree <input type="checkbox"/><br>Neutral <input type="checkbox"/><br>Agree <input type="checkbox"/><br>Strongly Agree <input type="checkbox"/> |
| <b>A58</b> | <i>ATTITU<br/>DE5</i> | I worry that boys will tease me about my period                | Strongly Disagree <input type="checkbox"/><br>Disagree <input type="checkbox"/><br>Neutral <input type="checkbox"/>                                                                              |

|                                                                                              |                       |                                                                                                               |                                                                                                                                                                                                                                                                                                                                                                             |
|----------------------------------------------------------------------------------------------|-----------------------|---------------------------------------------------------------------------------------------------------------|-----------------------------------------------------------------------------------------------------------------------------------------------------------------------------------------------------------------------------------------------------------------------------------------------------------------------------------------------------------------------------|
|                                                                                              |                       |                                                                                                               | <p>Agree <input type="checkbox"/></p> <p>Strongly Agree <input type="checkbox"/></p>                                                                                                                                                                                                                                                                                        |
| <b>A59</b>                                                                                   | <i>ATTITU<br/>DE6</i> | I am anxious about my next period                                                                             | <p>Strongly Disagree <input type="checkbox"/></p> <p>Disagree <input type="checkbox"/></p> <p>Neutral <input type="checkbox"/></p> <p>Agree <input type="checkbox"/></p> <p>Strongly Agree <input type="checkbox"/></p>                                                                                                                                                     |
| <b>PART VIII: PARTICIPATION</b>                                                              |                       |                                                                                                               |                                                                                                                                                                                                                                                                                                                                                                             |
| <b>The following questions are about how your period may affect your everyday activities</b> |                       |                                                                                                               |                                                                                                                                                                                                                                                                                                                                                                             |
| <b>A60</b>                                                                                   | <i>PRTCPT<br/>N1</i>  | In the last 3 months, have you missed work/school because of your period?                                     | <p>Yes <input type="checkbox"/> No <input type="checkbox"/></p> <p><b>If "No", skip next question</b></p>                                                                                                                                                                                                                                                                   |
| <b>A61</b>                                                                                   | <i>PRTCPT<br/>N2</i>  | Why did you miss work/school?                                                                                 | <p>Please tick all that apply:</p> <p>Pain <input type="checkbox"/></p> <p>Nothing To Use To Manage My Period <input type="checkbox"/></p> <p>No place to change or wash <input type="checkbox"/></p> <p>Ashamed or embarrassed <input type="checkbox"/></p> <p>Scared I will leak <input type="checkbox"/></p> <p>Told to go home/Not allowed <input type="checkbox"/></p> |
| <b>A62</b>                                                                                   | <i>PRTCPT<br/>N3</i>  | In the last 3 months, have you missed social events or community/religious happenings because of your period? | <p>Yes <input type="checkbox"/> No <input type="checkbox"/></p> <p><b>If "No", skip next question</b></p>                                                                                                                                                                                                                                                                   |
| <b>A63</b>                                                                                   | <i>PRTCPT<br/>N4</i>  | Why did you miss the social events or social/religious happenings?                                            | <p>Please tick all that apply:</p> <p>Pain <input type="checkbox"/></p> <p>Nothing To Use To Manage My Period <input type="checkbox"/></p> <p>No place to change or wash <input type="checkbox"/></p> <p>Ashamed or embarrassed <input type="checkbox"/></p>                                                                                                                |

|                                                                                                   |                  |                                                                                               |                                                                                                                                                                                                                                                                                                                                                                                                 |
|---------------------------------------------------------------------------------------------------|------------------|-----------------------------------------------------------------------------------------------|-------------------------------------------------------------------------------------------------------------------------------------------------------------------------------------------------------------------------------------------------------------------------------------------------------------------------------------------------------------------------------------------------|
|                                                                                                   |                  |                                                                                               | Scared I will leak <input type="checkbox"/><br>Told to go home/Not allowed <input type="checkbox"/>                                                                                                                                                                                                                                                                                             |
| <b>A64</b>                                                                                        | <i>PRTCPT N5</i> | In the last 3 months, what everyday activities have you missed out on because of your period? | Please tick all that apply:<br>Household activities (washing clothes, dishes, etc) <input type="checkbox"/><br>Sports (athletics, running, swimming, etc) <input type="checkbox"/><br>Income-generating activities <input type="checkbox"/><br>Religious activities <input type="checkbox"/><br>Socialising with friends and family <input type="checkbox"/><br>School <input type="checkbox"/> |
| <b>PART IX: FACTORS AT HOME</b>                                                                   |                  |                                                                                               |                                                                                                                                                                                                                                                                                                                                                                                                 |
| <b>The following questions are about the surroundings in which you manage your period at home</b> |                  |                                                                                               |                                                                                                                                                                                                                                                                                                                                                                                                 |
| At home during my last (most recent) period...                                                    |                  |                                                                                               |                                                                                                                                                                                                                                                                                                                                                                                                 |
| <b>A65</b>                                                                                        | <i>FHOME 1</i>   | I was able to change my menstrual products <u>when</u> I wanted to                            | Strongly Disagree <input type="checkbox"/><br>Disagree <input type="checkbox"/><br>Agree <input type="checkbox"/><br>Strongly Agree <input type="checkbox"/>                                                                                                                                                                                                                                    |
| <b>A66</b>                                                                                        | <i>FHOME 2</i>   | I was satisfied with the place I used to change my menstrual products                         | Strongly Disagree <input type="checkbox"/><br>Disagree <input type="checkbox"/><br>Agree <input type="checkbox"/><br>Strongly Agree <input type="checkbox"/>                                                                                                                                                                                                                                    |
| <b>A67</b>                                                                                        | <i>FHOME 3</i>   | I had a clean place to change my menstrual products                                           | Strongly Disagree <input type="checkbox"/><br>Disagree <input type="checkbox"/><br>Agree <input type="checkbox"/><br>Strongly Agree <input type="checkbox"/>                                                                                                                                                                                                                                    |
| <b>A68</b>                                                                                        | <i>FHOME 4</i>   | I was worried I would not be able to change my menstrual products <u>when</u> I needed to     | Strongly Disagree <input type="checkbox"/><br>Disagree <input type="checkbox"/><br>Agree <input type="checkbox"/><br>Strongly Agree <input type="checkbox"/>                                                                                                                                                                                                                                    |
| <b>A69</b>                                                                                        | <i>FHOME 5</i>   | I was worried someone would                                                                   | Strongly Disagree <input type="checkbox"/>                                                                                                                                                                                                                                                                                                                                                      |

|                                                                                                                       |                    |                                                                                       |                                                                                                                                                                                                                                                                         |
|-----------------------------------------------------------------------------------------------------------------------|--------------------|---------------------------------------------------------------------------------------|-------------------------------------------------------------------------------------------------------------------------------------------------------------------------------------------------------------------------------------------------------------------------|
|                                                                                                                       |                    | see me while I was changing my menstrual products                                     | Disagree <input type="checkbox"/><br>Agree <input type="checkbox"/><br>Strongly Agree <input type="checkbox"/>                                                                                                                                                          |
| <b>A70</b>                                                                                                            | <i>FHOME</i><br>6  | I was worried someone would harm me while I was changing my menstrual products        | Strongly Disagree <input type="checkbox"/><br>Disagree <input type="checkbox"/><br>Agree <input type="checkbox"/><br>Strongly Agree <input type="checkbox"/>                                                                                                            |
| <b>A71</b>                                                                                                            | <i>FHOME</i><br>7  | I was worried something else would harm me while I was changing my menstrual products | Strongly Disagree <input type="checkbox"/><br>Disagree <input type="checkbox"/><br>Agree <input type="checkbox"/><br>Strongly Agree <input type="checkbox"/>                                                                                                            |
| <b>A72</b>                                                                                                            | <i>FHOME</i><br>8  | Do you have access to a clean water source at your home                               | Yes <input type="checkbox"/> No <input type="checkbox"/><br><b>If "No", skip next question</b>                                                                                                                                                                          |
| <b>A73</b>                                                                                                            | <i>FHOME</i><br>9  | Where is your clean water source located?                                             | Please tick all that apply:<br>Inside the toilet <input type="checkbox"/><br>Outside the toilet but inside the home <input type="checkbox"/><br>Outside the house but inside the yard of my home <input type="checkbox"/><br>In a public space <input type="checkbox"/> |
| <b>A74</b>                                                                                                            | <i>FHOME</i><br>10 | Do you have access to a toilet at home                                                | Yes <input type="checkbox"/> No <input type="checkbox"/><br><b>If "No", skip next question</b>                                                                                                                                                                          |
| <b>A75</b>                                                                                                            | <i>FHOME</i><br>11 | Where is your toilet located?                                                         | Inside the house <input type="checkbox"/><br>Outside the house but inside the yard <input type="checkbox"/><br>In a public space <input type="checkbox"/>                                                                                                               |
| <b>A76</b>                                                                                                            | <i>FHOM1</i><br>2  | Does your toilet have a door and a working lock on the inside (for privacy)?          | Yes <input type="checkbox"/> No <input type="checkbox"/>                                                                                                                                                                                                                |
| <b>PART IX: FACTORS AT SCHOOL/WORK</b><br>The following questions are about how you manage your period at school/work |                    |                                                                                       |                                                                                                                                                                                                                                                                         |

| At school/work during my last period... |             |                                                                                           |                                                                                                                                                                                                         |
|-----------------------------------------|-------------|-------------------------------------------------------------------------------------------|---------------------------------------------------------------------------------------------------------------------------------------------------------------------------------------------------------|
| <b>A77</b>                              | <i>FSW1</i> | I was able to change my menstrual products <u>when</u> I wanted to                        | Strongly Disagree <input type="checkbox"/><br>Disagree <input type="checkbox"/><br>Agree <input type="checkbox"/><br>Strongly Agree <input type="checkbox"/><br>Not Applicable <input type="checkbox"/> |
| <b>A78</b>                              | <i>FSW2</i> | I was satisfied with the place I used to change my menstrual products                     | Strongly Disagree <input type="checkbox"/><br>Disagree <input type="checkbox"/><br>Agree <input type="checkbox"/><br>Strongly Agree <input type="checkbox"/><br>Not Applicable <input type="checkbox"/> |
| <b>A79</b>                              | <i>FSW3</i> | I had a clean place to change my menstrual materials                                      | Strongly Disagree <input type="checkbox"/><br>Disagree <input type="checkbox"/><br>Agree <input type="checkbox"/><br>Strongly Agree <input type="checkbox"/><br>Not Applicable <input type="checkbox"/> |
| <b>A80</b>                              | <i>FSW4</i> | I was worried I would not be able to change my menstrual material <u>when</u> I needed to | Strongly Disagree <input type="checkbox"/><br>Disagree <input type="checkbox"/><br>Agree <input type="checkbox"/><br>Strongly Agree <input type="checkbox"/><br>Not Applicable <input type="checkbox"/> |
| <b>A81</b>                              | <i>FSW5</i> | I was worried someone would see me while I was changing my menstrual products             | Strongly Disagree <input type="checkbox"/><br>Disagree <input type="checkbox"/><br>Agree <input type="checkbox"/><br>Strongly Agree <input type="checkbox"/><br>Not Applicable <input type="checkbox"/> |
| <b>A82</b>                              | <i>FSW6</i> | I was worried someone would                                                               | Strongly Disagree <input type="checkbox"/>                                                                                                                                                              |

|            |              |                                                                                       |                                                                                                                                                                                                                                                                                                                          |
|------------|--------------|---------------------------------------------------------------------------------------|--------------------------------------------------------------------------------------------------------------------------------------------------------------------------------------------------------------------------------------------------------------------------------------------------------------------------|
|            |              | harm me while I was changing my menstrual products                                    | Disagree <input type="checkbox"/><br>Agree <input type="checkbox"/><br>Strongly Agree <input type="checkbox"/><br>Not Applicable <input type="checkbox"/>                                                                                                                                                                |
| <b>A83</b> | <i>FSW7</i>  | I was worried something else would harm me while I was changing my menstrual products | Strongly Disagree <input type="checkbox"/><br>Disagree <input type="checkbox"/><br>Agree <input type="checkbox"/><br>Strongly Agree <input type="checkbox"/><br>Not Applicable <input type="checkbox"/>                                                                                                                  |
| <b>A84</b> | <i>FSW8</i>  | Do you have access to a toilet at school/work?                                        | Yes <input type="checkbox"/> No <input type="checkbox"/><br>Not Applicable <input type="checkbox"/><br><b>If "No" or "Not Applicable", skip next 2 questions</b>                                                                                                                                                         |
| <b>A85</b> | <i>FSW9</i>  | Where is your toilet located?                                                         | Inside the building <input type="checkbox"/><br>Outside the building but inside the school/work yard <input type="checkbox"/><br>In a public area, outside the school/work yard <input type="checkbox"/>                                                                                                                 |
| <b>A88</b> | <i>FSW12</i> | Does your toilet have a door and a working lock on the inside (for privacy)?          | Yes <input type="checkbox"/> No <input type="checkbox"/>                                                                                                                                                                                                                                                                 |
| <b>A86</b> | <i>FSW10</i> | Do you have access to water at school/work?                                           | Yes <input type="checkbox"/> No <input type="checkbox"/><br>Not Applicable <input type="checkbox"/><br><b>If "No" or "Not Applicable", skip next question</b>                                                                                                                                                            |
| <b>A87</b> | <i>FSW11</i> | Where is your water source located?                                                   | Please tick all that apply:<br>Inside the toilet <input type="checkbox"/><br>Outside the toilet but inside the school/work building <input type="checkbox"/><br>Outside the building but inside the school/work yard <input type="checkbox"/><br>In a public area, outside the school/work yard <input type="checkbox"/> |

**THANK YOU FOR YOUR TIME AND YOUR ANSWERS!**
